# Supplementary material for: Methods to include persons living with HIV not receiving HIV care in the Medical Monitoring Project
Source: PLoS One. 2019 Aug 1;14(8):e0219996. doi: 10.1371/journal.pone.0219996 (PMC6675081; doi:10.1371/journal.pone.0219996)
Supplement: S1 Table — (DOCX) [file pone.0219996.s001.docx]

S1 Table: Variables included in final models predicting successful contact by project area and year, Case-Surveillance-Based Sampling demonstration project 2012-2014

|  | **2012** | | | | **2013** | | | | **2014** | | | |
| --- | --- | --- | --- | --- | --- | --- | --- | --- | --- | --- | --- | --- |
| Variable | LAC | NYC | SFO | WA | LAC | NYC | SFO | WA | LAC | NYC | SFO | WA |
| AIDS status |  |  |  |  | X | X | X | X | X | X | X | X |
| Care status |  |  |  | X | X | X | X | X | X | X | X | X |
| Number jurisdictions reporting | X | X | X | X | X | X | X | X | X | X | X | X |
| Race/Ethnicity: Hispanic | X | X | X | X |  |  |  |  | X | X | X | X |
| Race/Ethnicity: Non-Hispanic Black | X | X | X | X |  |  |  |  |  |  |  |  |
| Race/Ethnicity: Non-Hispanic White | X | X | X | X |  |  |  |  | X | X | X | X |
| Residence in project area of sampling1 | N/A | N/A | N/A | N/A | X | X | X | X | X | X | X | X |
| Sex | X | X | X | X |  |  |  |  | X | X | X | X |
| Suppressed HIV viral load2 | X | X | X | X | X | X | X | X | N/A | N/A | N/A | N/A |
| Time since last reported lab test3 | X | X | X |  | N/A | N/A | N/A | N/A | N/A | N/A | N/A | N/A |
| Transmission risk | X | X | X | X | X | X | X | X |  |  |  |  |
| Age at HIV diagnosis |  |  |  |  | X | X | X | X | X | X | X | X |
| Age on sampling date |  |  |  |  | X | X | X | X | X | X | X | X |
| Contact information age | X | X | X | X | X | X | X | X | X | X | X | X |
| Time since diagnosis | X | X | X | X | X | X | X | X |  |  |  |  |

1Indicates persons in 2013 and 2014 who actually resided in the project area in which they were sampled. In 2012, procedures had not yet been established to contact and interview out of jurisdiction persons so this variable was not applicable.

2This variable was excluded in 2014, because it was judged to be duplicative of care status, another measure of retention in care.

3This variable was excluded in 2013 and 2014, because it was judged to be duplicative of care status, another measure of retention in care.
